# Supplementary material for: Effects of tea saponin on the foaming properties of pea protein
Source: Royal Society of Chemistry journal article supplement (doi:10.1039/d3fo00104k), 2023-01-01
Supplement: d3fo00104k1.pdf [file d3fo00104k1.pdf]

## Effect of tea saponin on the foaming properties of pea protein

Jiaying Xie <sup>a</sup>, Weijuan Huang <sup>a, b, \*</sup>, Xuehui Wu <sup>a, c, \*</sup>

<sup>a</sup> College of Food Science, South China Agricultural University, Guangzhou 510642, China

<sup>b</sup> Research Center for Green Development of Agriculture, South China Agricultural University, Guangzhou 510642, China

<sup>c</sup> Guangdong Engineering Research Center for Oil-Tea Camellia, Guangzhou 510642, China

Corresponding author:

Dr. Xuehui Wu

E-mail: [xuehwuscau@163.com](mailto:xuehwuscau@163.com); Phone: +(86) 02085280266; Fax: +(86) 02085280270

Dr. Weijuan Huang

Email: [weijuanhuang@scau.edu.cn](mailto:weijuanhuang@scau.edu.cn)

## 1 **1. Methods**

### 2 1.1. Chemical structure characteristics

3 Fourier transform infrared spectroscopy spectra of the PPI, TS, PPI-TS complexes in  
4 powder form were measured by using a FTIR spectrometer (Vertex 70, Bruker). The  
5 PPI-TS complexes were prepared by immediately freezing the foam prepared from 50  
6 mg/mL PPI and 0.4% TS complex solution in liquid nitrogen at pH7, and then freeze-  
7 dried. Individual PPI and TS were purchased sample powders without any treatment.  
8 The samples (1 mg) were mixed with potassium bromide (KBr) powder (99 mg) and  
9 then pressed into pellets. The samples were scanned in the wavenumber range of 4000  
10  $\text{cm}^{-1}$  to 400  $\text{cm}^{-1}$  by accumulating 64 scans with a resolution of 4  $\text{cm}^{-1}$ .

11

## 12 **2. Result and discussion**

### 13 2.2. Chemical structure analysis

14 Figure 1S illustrates the potential intermolecular interaction between pea protein isolate  
15 and tea saponin by FTIR spectrum. After the addition of TS, no new absorption peak  
16 was found, indicating that there was no new chemical group.

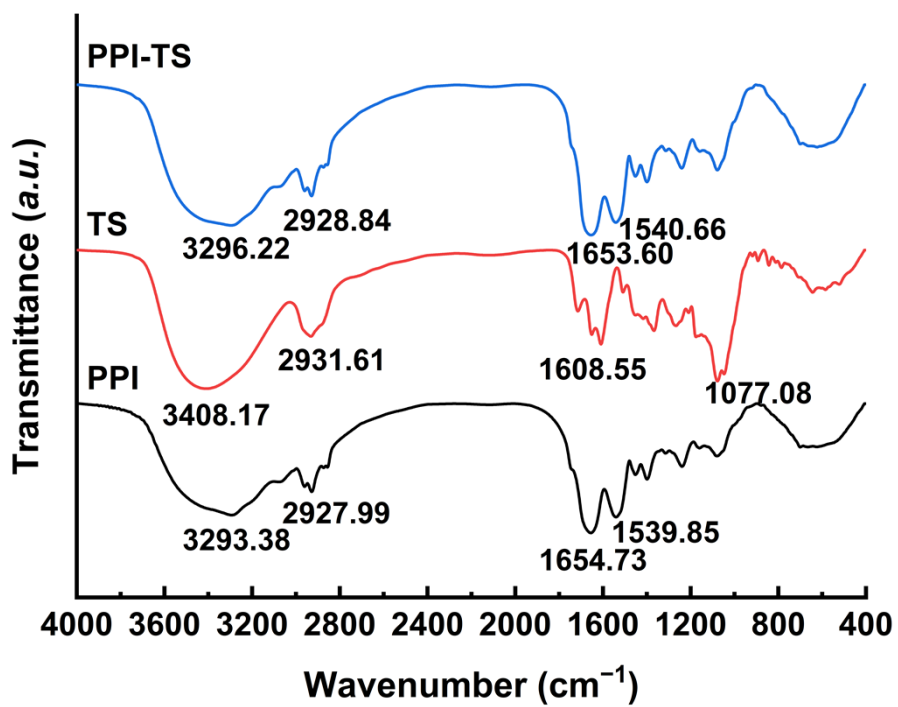

17

18 Figure 1S. Fourier transform infrared spectroscopy spectra of pea protein isolate, tea

19 saponin and PPI-TS complexes.

Table 1S. Effects of pea protein concentrations, tea saponin percent, and pH values on the droplet sizes ( $D_{3,2}$ ,  $D_{4,3}$ ).

| Sample                   | $D_{3,2}$ ( $\mu\text{m}$ ) | $D_{4,3}$ ( $\mu\text{m}$ ) |
|--------------------------|-----------------------------|-----------------------------|
| 10 mg/mL PPI+0.2% TS     | $50.45 \pm 0.64$            | $113.50 \pm 2.12$           |
| 25 mg/mL PPI+0.2% TS     | $53.60 \pm 0.71$            | $123.00 \pm 1.41$           |
| 50 mg/mL PPI+0.2% TS     | $38.17 \pm 1.55$            | $95.20 \pm 4.36$            |
| 100 mg/mL PPI+0.2% TS    | $38.05 \pm 0.92$            | $85.90 \pm 2.26$            |
| 50 mg/mL PPI             | $33.67 \pm 1.02$            | $81.73 \pm 1.91$            |
| 50 mg/mL PPI+0.2% TS     | $38.17 \pm 1.55$            | $95.20 \pm 4.36$            |
| 50 mg/mL PPI+0.4% TS     | $29.85 \pm 0.35$            | $75.10 \pm 0.42$            |
| 50 mg/mL PPI+0.6% TS     | $41.35 \pm 0.07$            | $103.00 \pm 1.41$           |
| 50 mg/mL PPI+0.8% TS     | $40.03 \pm 1.61$            | $95.83 \pm 3.01$            |
| 50 mg/mL PPI+0.4% TS pH3 | $16.70 \pm 0.20$            | $43.23 \pm 0.38$            |
| 50 mg/mL PPI+0.4% TS pH5 | $17.00 \pm 0.28$            | $31.05 \pm 0.07$            |
| 50 mg/mL PPI+0.4% TS pH7 | $29.85 \pm 0.35$            | $75.10 \pm 0.42$            |
| 50 mg/mL PPI+0.4% TS pH9 | $26.55 \pm 0.35$            | $71.15 \pm 2.19$            |
